# Supplementary material for: Introductory Molecular Genetics
Source: Springer Nature journal article supplement (doi:10.1038/onc.2013.433), 1986-12-01
Supplement: 41388_2014_BFonc2013433_MOESM34_ESM.pdf [file 41388_2014_BFonc2013433_MOESM34_ESM.pdf]

Figure S1

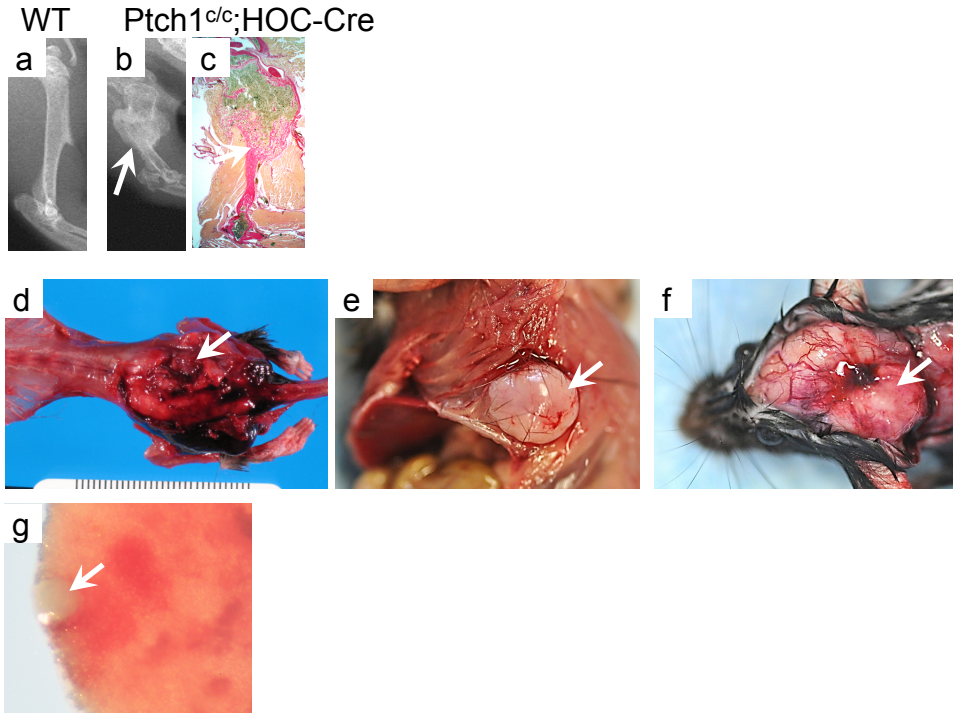

Figure S2

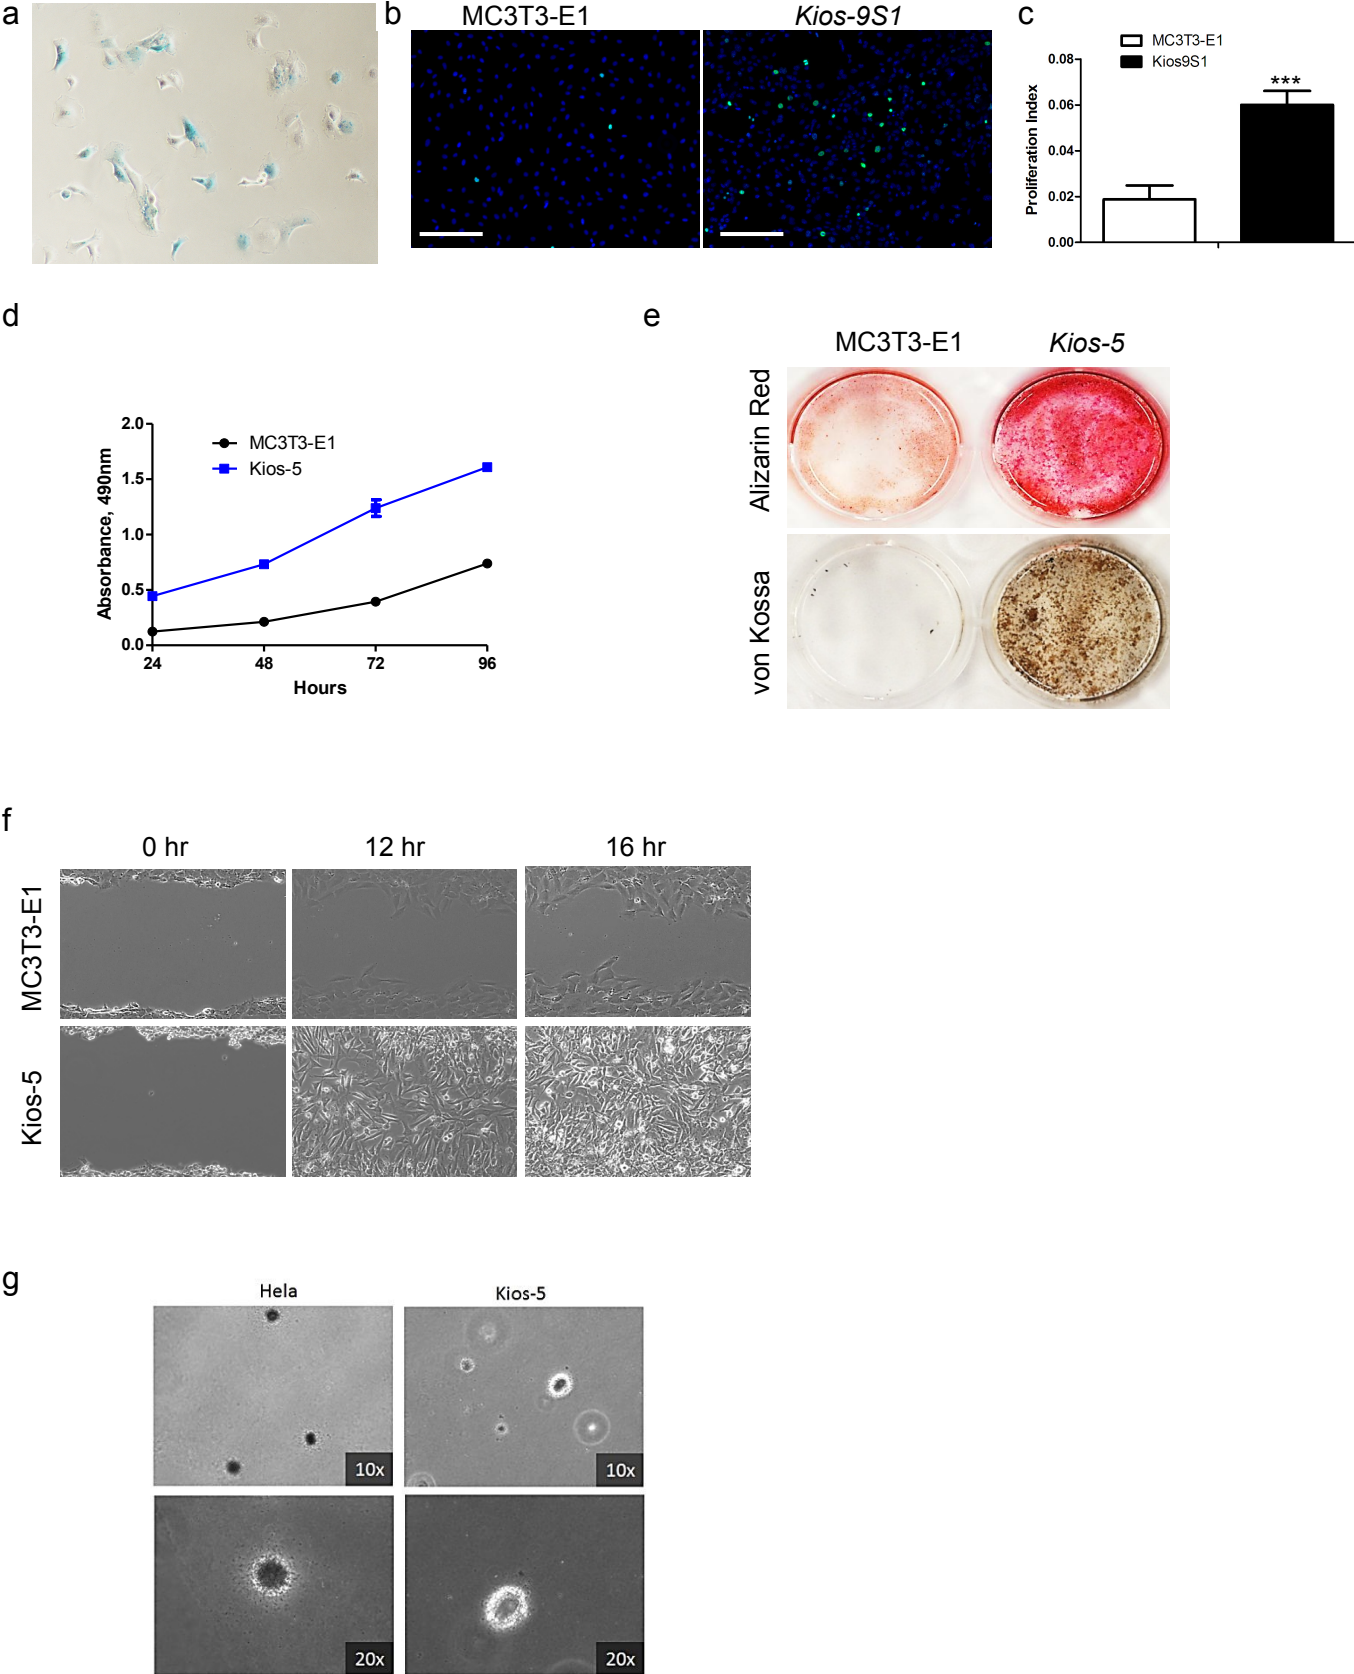

Figure S3

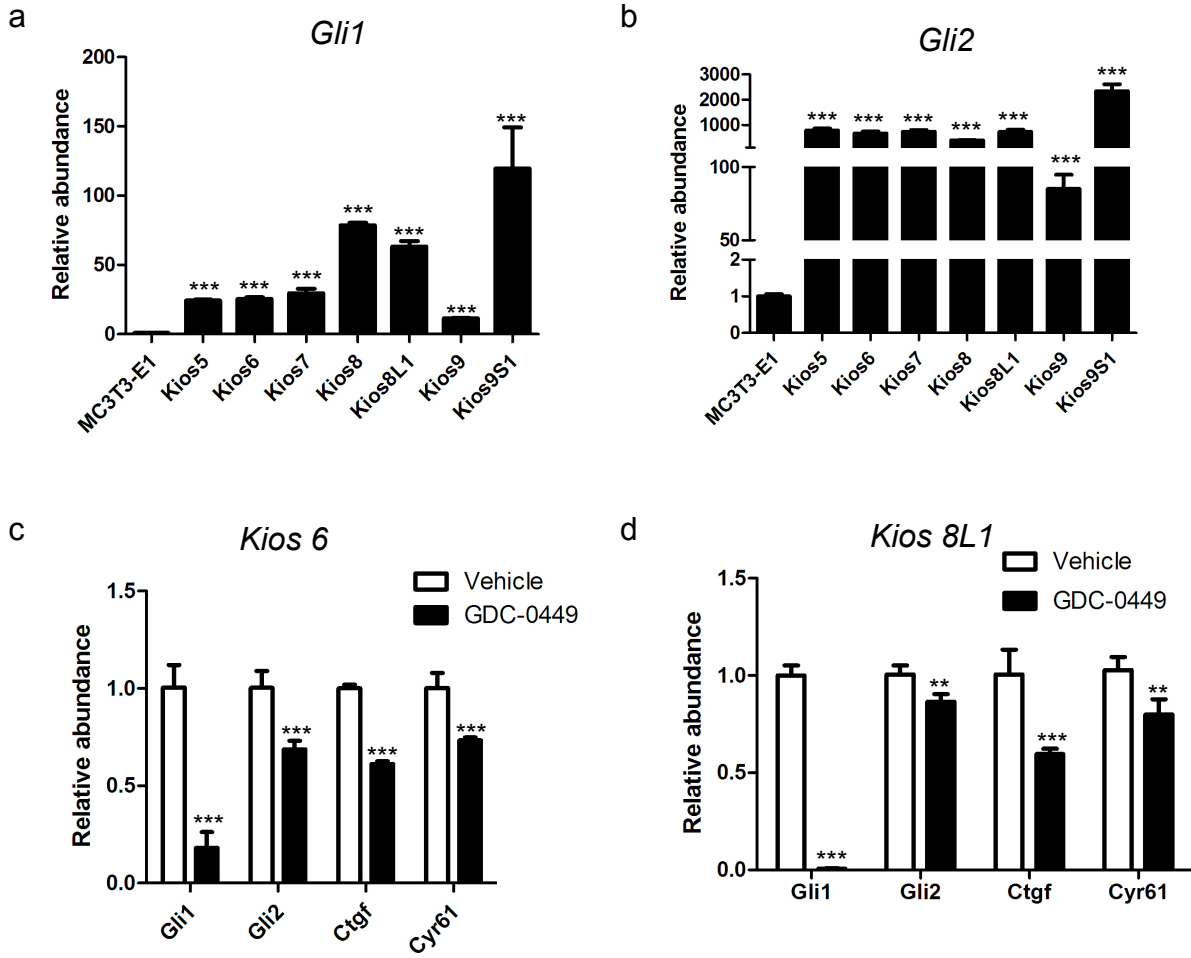

Figure S4

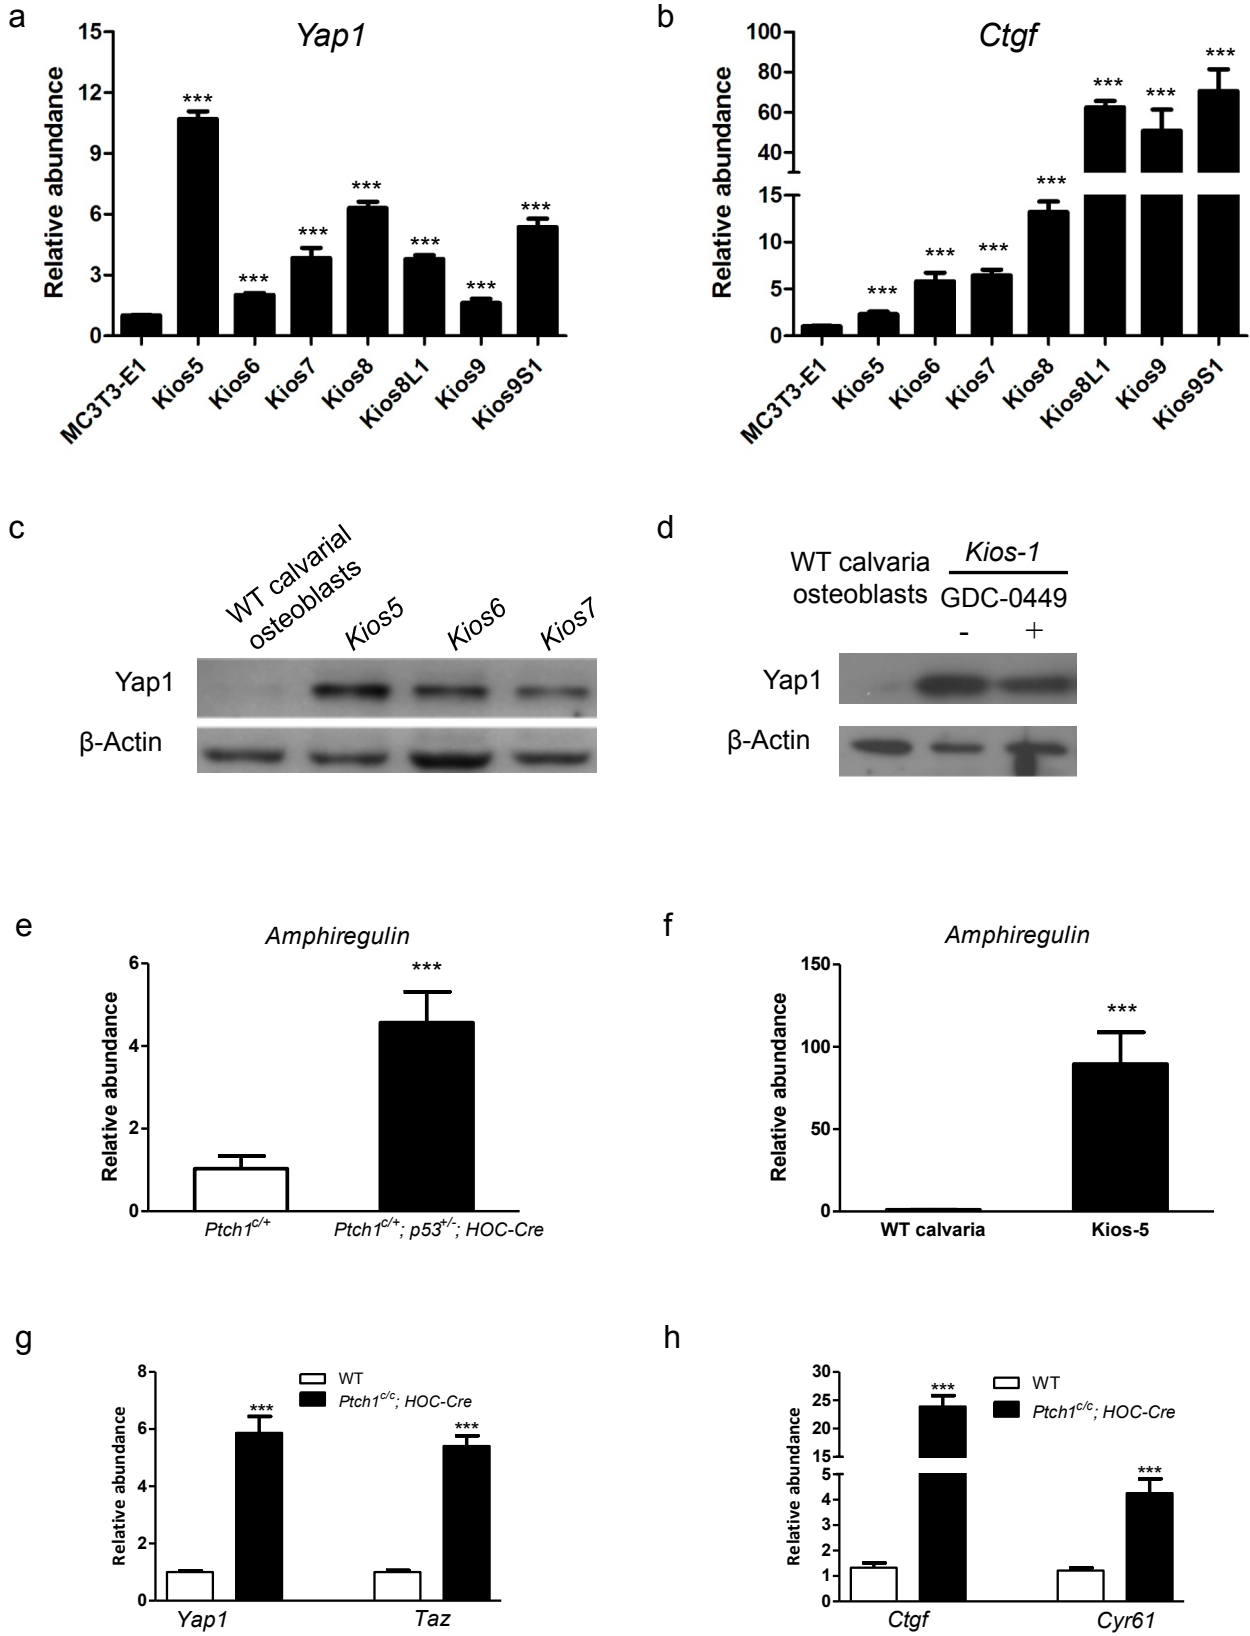

Figure S5

a

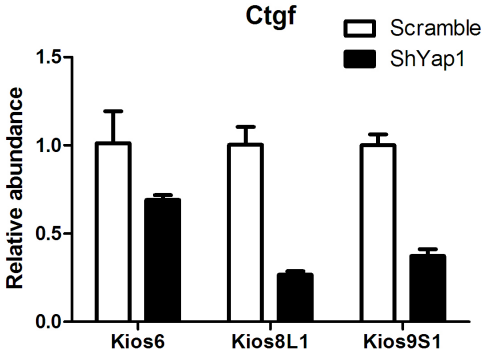

b

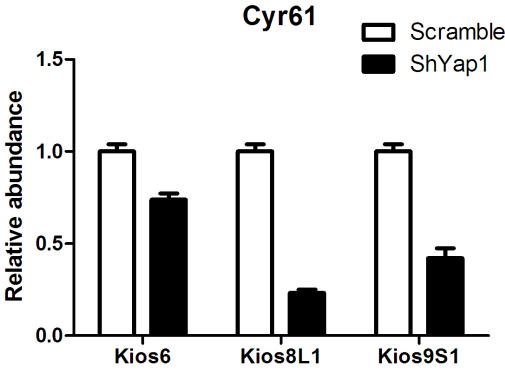

# Figure S6

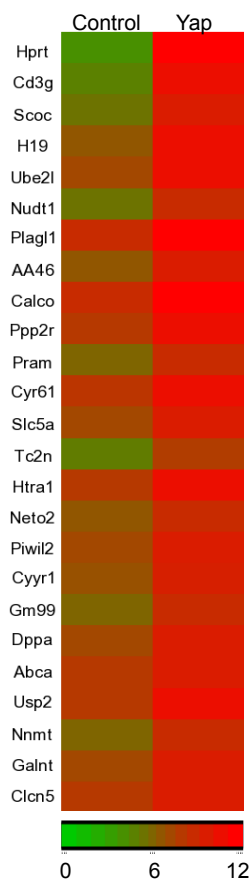

| Gene Symbol | Increased Fold Difference |
|-------------|---------------------------|
| Hprt        | 240.882                   |
| Cd3g        | 40.333                    |
| Scoc        | 20.7175                   |
| H19         | 18.2317                   |
| Ube2l6      | 8.84044                   |
| Nudt10      | 8.47069                   |
| Plagl1      | 7.95893                   |
| AA467197    | 7.29153                   |
| Calcoco2    | 6.82036                   |
| Ppp2r2c     | 5.91356                   |
| Prame17     | 5.83715                   |
| Cyr61       | 5.46641                   |
| Slc5a1      | 5.43458                   |
| Tc2n        | 5.35783                   |
| Htra1       | 5.29825                   |
| Neto2       | 4.92484                   |
| Piwil2      | 4.91624                   |
| Cyrr1       | 4.81918                   |
| Gm9992      | 4.76269                   |
| Dppa3       | 4.65875                   |

# Table S1

| YAP<br>expression | Case no. (%) <sup>*</sup> | Male |                | Female |                | Male:Female | Age       |        |
|-------------------|---------------------------|------|----------------|--------|----------------|-------------|-----------|--------|
|                   |                           | Male | % <sup>^</sup> | Female | % <sup>^</sup> |             | Mean ± SD | Median |
| High              | 15 (28)                   | 10   | 25.6           | 5      | 33.3           | 1 : 1.27    | 22 ± 12   | 19     |
| Moderate          | 27 (50)                   | 19   | 48.7           | 8      | 53.3           | 1 : 1.08    | 21 ± 11   | 19     |
| Negative          | 12 (22)                   | 10   | 25.6           | 2      | 13.3           | 1 : 0.5     | 23 ± 14   | 18.5   |

<sup>\*</sup> Percentage of total case, excluding the non-cancer granulation tissue and 5 damaged tissues.

<sup>^</sup> Percentage of case in each gender.

Table S2

| No. | Age | Sex | Organ                        | Diagnosis                                    | YAP expression | Survival  |
|-----|-----|-----|------------------------------|----------------------------------------------|----------------|-----------|
| 36  | 5   | M   | Bone, femur                  | osteosarcoma                                 | +++            | dead      |
| 33  | 9   | M   | Bone, femur                  | osteosarcoma                                 | +++            |           |
| 34  | 12  | F   | Bone, tibia                  | osteosarcoma, chondroblastic type            | +++            | dead      |
| 29  | 14  | M   | Bone, femur                  | osteosarcoma                                 | +++            |           |
| 32  | 14  | M   | Bone, femur                  | osteosarcoma, osteoblastic type              | +++            |           |
| 18  | 16  | M   | Leg                          | osteosarcoma, chondroblastic type            | +++            | dead      |
| 19  | 18  | M   | Bone, femur                  | osteosarcoma, telangiectatic type            | +++            | dead      |
| 17  | 19  | M   | Bone, femur                  | osteosarcoma, osteoblastic type              | +++            |           |
| 26  | 19  | M   | Bone, femur                  | osteosarcoma                                 | +++            | no record |
| 47  | 22  | M   | Bone, tibia and fibula       | osteosarcoma, osteoblastic type              | +++            | dead      |
| 43  | 24  | F   | Bone, tibia and fibula       | osteosarcoma, osteoblastic type              | +++            |           |
| 58  | 31  | F   | Bone, tibia                  | osteosarcoma, osteoblastic type              | +++            |           |
| 6   | 37  | M   | Bone, pelvis                 | osteosarcoma                                 | +++            | dead      |
| 14  | 44  | F   | Hip                          | osteosarcoma                                 | +++            | dead      |
| 16  | 44  | F   | Bone, femur                  | osteosarcoma                                 | +++            | dead      |
| 35  | 9   | F   | Bone, tibia                  | osteosarcoma, chondroblastic type            | ++             | dead      |
| 20  | 10  | M   | Bone, femur                  | osteosarcoma, osteoblastic type              | ++             |           |
| 21  | 10  | M   | Bone, femur                  | osteosarcoma, osteoblastic type              | ++             |           |
| 22  | 10  | M   | Bone, femur                  | osteosarcoma, osteoblastic type              | ++             |           |
| 27  | 10  | M   | Bone, femur                  | osteosarcoma, osteoblastic type              | ++             |           |
| 23  | 11  | F   | Bone, femur                  | osteosarcoma, osteoblastic type              | ++             | dead      |
| 24  | 11  | M   | Bone, femur                  | osteosarcoma, osteoblastic type              | ++             | dead      |
| 37  | 11  | M   | Bone, fibula                 | osteosarcoma, chondroblastic type            | ++             | dead      |
| 38  | 11  | M   | Bone, fibula                 | osteosarcoma, chondroblastic type            | ++             |           |
| 53  | 16  | F   | Bone, femur                  | osteosarcoma                                 | ++             |           |
| 10  | 18  | M   | Bone, femur                  | osteosarcoma, chondroblastic type            | ++             |           |
| 30  | 18  | M   | Bone, mandible               | osteosarcoma                                 | ++             |           |
| 46  | 18  | M   | Bone, femur                  | osteosarcoma, osteoblastic type              | ++             | dead      |
| 15  | 19  | M   | Bone, femur                  | osteosarcoma, osteoblastic type              | ++             | dead      |
| 25  | 19  | M   | Bone, femur                  | osteosarcoma                                 | ++             | no record |
| 48  | 20  | F   | Bone, tibia                  | osteosarcoma, osteoblastic type              | ++             | dead      |
| 54  | 20  | F   | Bone, femur                  | osteosarcoma, osteoblastic type              | ++             | dead      |
| 12  | 20  | M   | Knee                         | osteosarcoma, osteoblastic type              | ++             |           |
| 45  | 22  | M   | Bone, humerus                | osteosarcoma, osteoblastic type              | ++             | dead      |
| 49  | 22  | M   | Bone, humerus                | osteosarcoma, osteoblastic type              | ++             | dead      |
| 1   | 24  | M   | Bone, femur                  | osteosarcoma, osteoblastic type              | ++             |           |
| 50  | 24  | M   | Soft tissue, popliteal fossa | synovial sarcoma                             | ++             | dead      |
| 55  | 27  | M   | Bone, femur                  | osteosarcoma, osteoblastic type              | ++             | dead      |
| 57  | 29  | M   | Soft tissue                  | granulation tissue                           | ++             |           |
| 42  | 34  | F   | Lung                         | metastatic osteosarcoma, chondroblastic type | ++             |           |
| 13  | 35  | F   | Bone, humerus                | osteosarcoma                                 | ++             |           |
| 59  | 39  | M   | Bone, femur                  | osteosarcoma, osteoblastic type              | ++             | dead      |
| 60  | 61  | F   | Bone, ilium                  | radiation-induced sarcoma                    | ++             | dead      |
| 28  | 10  | M   | Bone, femur                  | osteosarcoma, osteoblastic type              | -              |           |
| 39  | 11  | M   | Bone, tibia                  | osteosarcoma                                 | -              | dead      |
| 3   | 16  | M   | Bone, femur                  | osteosarcoma                                 | -              | dead      |
| 2   | 17  | F   | Bone, femur                  | osteosarcoma                                 | -              |           |
| 52  | 17  | F   | Bone, tibia                  | osteosarcoma, fibroblastic type              | -              |           |
| 7   | 17  | M   | Bone, pelvis                 | osteosarcoma, chondroblastic type            | -              | dead      |
| 8   | 20  | M   | Bone, femur                  | osteosarcoma, chondroblastic type            | -              | dead      |
| 9   | 20  | M   | Bone, ilium                  | osteosarcoma, chondroblastic type            | -              | dead      |
| 4   | 23  | M   | Bone                         | osteosarcoma                                 | -              |           |
| 51  | 23  | M   | Bone, humerus                | osteosarcoma                                 | -              | dead      |
| 41  | 38  | M   | Mediastinum                  | extraskeletal osteosarcoma                   | -              |           |
| 56  | 59  | M   | Mandible                     | extraskeletal osteosarcoma                   | -              | dead      |
| 40  | 11  | M   | Bone, tibia                  | osteosarcoma                                 | not determined | dead      |
| 31  | 13  | M   | Bone, femur                  | osteosarcoma                                 | not determined |           |
| 5   | 14  | F   | Bone, femur                  | osteosarcoma                                 | not determined |           |
| 11  | 17  | M   | Bone, tibia                  | osteosarcoma, osteoblastic type              | not determined |           |
| 44  | 26  | M   | Bone, calcaneus              | osteosarcoma, osteoblastic type              | not determined |           |
